# Supplementary material for: Distinct Pattern of Endoplasmic Reticulum Protein Processing and Extracellular Matrix Proteins in Functioning and Silent Corticotroph Pituitary Adenomas
Source: MDPI journal article supplement (doi:10.3390/cancers12102980), 2020-10-14
Supplement: s1 [file s1]

# Supplementary Materials: Distinct Pattern of Endoplasmic Reticulum Protein Processing and Extracellular Matrix Proteins in Functioning and Silent Corticotroph Pituitary Adenomas

Alexander K. Eieland, Kjersti R. Normann, Arvind Y. M. Sundaram, Tuula A. Nyman, Kristin A. B. Øystese, Tove Lekva, Jens P. Berg, Jens Bollerslev and Nicoleta C. Olarescu

**Table S2.** Clinical characteristics of patients with functioning (FCA) and silent (SCA) corticotroph pituitary adenomas.

| Type_ID | Age (Y) | Gender F/M | Tumor diameter (mm) | Macro/ Micro | Ki67 (%) | ACTH (pmol/L) | Cortisol (nmol/L) | RNA-seq | Proteomics |
|---------|---------|------------|---------------------|--------------|----------|---------------|-------------------|---------|------------|
| FCA_1   | 50      | M          | 4                   | micro        |          |               |                   | yes     | yes        |
| FCA_2   | 56      | F          | 2                   | micro        | 1        | 4.4           | 715               | yes     | yes        |
| FCA_3   | 53      | M          | 4                   | micro        | 3        | 14.1          | 586               | yes     | yes        |
| FCA_4   | 37      | F          | 6                   | micro        | 3        | 4.4           | 654               | yes     | yes        |
| FCA_5   | 55      | M          | 30                  | macro        |          | 36.2          | 811               | yes     | no         |
| FCA_6   | 51      | F          | 8                   | micro        |          | 19.6          | 1122              | yes     | no         |
| FCA_7   | 19      | M          | 10                  | macro        | 3        | 14            | 438               | no      | yes        |
| FCA_8   | 45      | F          | 20                  | macro        | 4        | 12.5          | 253               | no      | yes        |
| FCA_9   | 30      | M          | 23                  | macro        |          |               |                   | no      | yes        |
| FCA_10  | 52      | F          | 18                  | macro        | 3        | 54            | 1059              | no      | yes        |
| FCA_11  | 45      | F          | 8                   | micro        | 3        | 15            | 659               | no      | yes        |
| FCA_12  | 35      | F          | 10                  | micro        | 3        | 13.3          | 971               | no      | yes        |
| FCA_13  | 50      | F          | 5                   | micro        |          | 3.7           | 512               | no      | yes        |
| FCA_14  | 59      | M          | 6                   | micro        |          | 10.2          | 940               | no      | yes        |
| SCA_1   | 37      | M          | 25                  | macro        | 3        |               | 574               | yes     | yes        |
| SCA_2   | 68      | F          | 26                  | macro        | 5        | 5.6           | 514               | yes     | yes        |
| SCA_3   | 74      | F          | 62                  | macro        | 3        |               | 267               | yes     | yes        |
| SCA_4   | 51      | M          | 36                  | macro        | 3        |               | 173               | yes     | yes        |
| SCA_5   | 55      | M          | N/A                 | N/A          |          |               |                   | yes     | yes        |
| SCA_6   | 52      | M          | N/A                 | N/A          |          |               |                   | yes     | yes        |
| SCA_7   | 67      | M          | 24                  | macro        | 3        | 11.7          | 461               | no      | yes        |
| SCA_8   | 49      | M          | 24                  | macro        | 3        | 14.7          | 477               | no      | yes        |

|        |    |   |     |       |   |     |    |     |
|--------|----|---|-----|-------|---|-----|----|-----|
| SCA_9  | 70 | F | 19  | macro | 5 | 222 | no | yes |
| SCA_10 | 32 | F | 16  | macro |   |     | no | yes |
| SCA_11 | 55 | M | N/A | N/A   |   |     | no | yes |
| SCA_12 | 53 | M | N/A | N/A   |   |     | no | yes |

Age at operation in years (Y), Gender Female/Male (F/M), Tumor size showing largest measured diameter in millimeter (mm), Tumor size: Macroadenoma (Macro)  $\geq 10$  mm, Microadenoma (Micro)  $< 10$  mm, Ki67 proliferation index (%); pre-operatively plasma ACTH (pmol/L), normal range  $< 10.2$  pmol/L; pre-operatively plasma Cortisol, normal range 112-502 nmol/L. Tumors analyzed in the RNA seq. and/or proteomics = yes. Protein amount was insufficient in two patients with functioning corticotroph adenomas (FCA\_5 and FCA\_6), so these were not included in proteomics study.

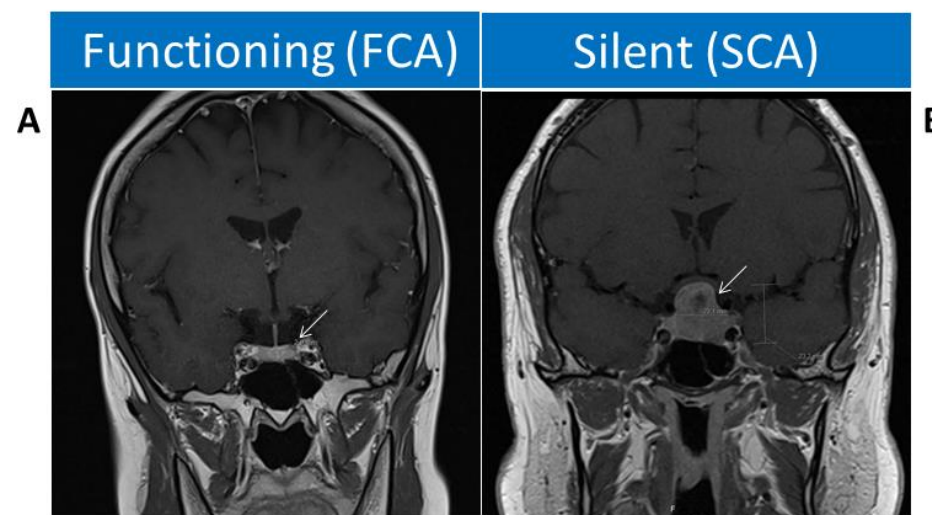

**Figure 1** Coronal MRI pictures of a functioning FCA (A) – a 2.9 mm tumor located in the upper and to the left part of the sella region, and a silent SCA (B) pituitary corticotroph adenoma – a 22 x 23 mm tumor that occupies the entire sella region and seems to invade the left parasellar region

**Figure S1.** Coronal MRI pictures of a functioning FCA (A) and a silent SCA (B) pituitary corticotroph adenoma,.

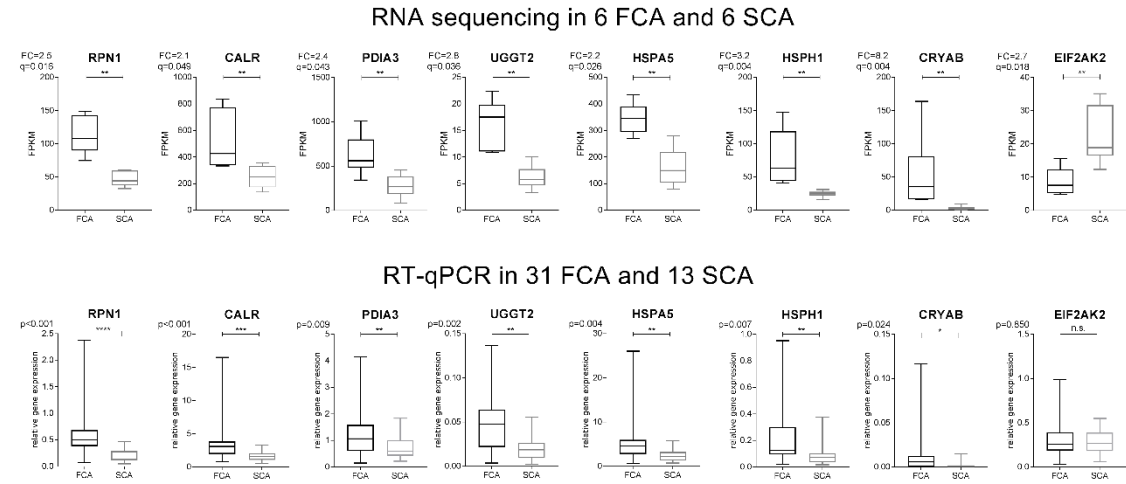

Data is presented as box and whiskers and min to max. FC, fold of change; q, adjusted p value; RT-qPCR data is analysed using GraphPad program by Mann-Whitney test and  $p < 0.05$  is statistical significant; Functioning (FCA) and silent corticotroph (SCA) pituitary adenomas.

**Figure S2.** protein processing activity of endoplasmic reticulum in functioning pituitary corticotroph adenoma (FCA).

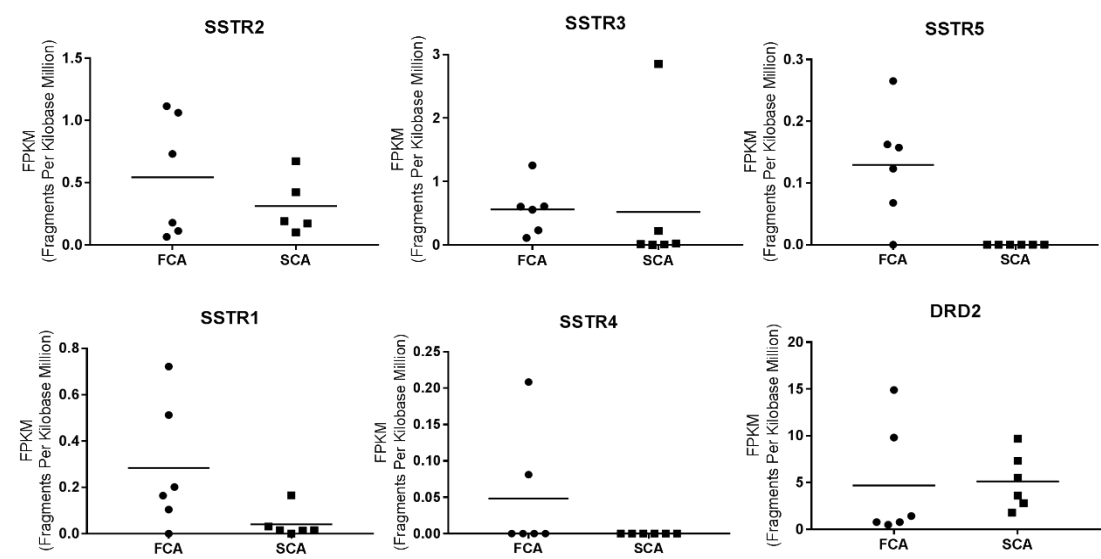

**Figure S3.** Gene expression of somatostatin receptors (SSRs) 1-5 and dopamine receptor type 2 (DRD2) in functioning (FCA) and silent (SCA) corticotroph pituitary adenomas.
